# Supplementary material for: In situ Raman and FTIR spectroscopic study on the formation of the isomers MIL-68(Al) and MIL-53(Al)
Source: Royal Society of Chemistry journal article supplement (doi:10.1039/c9ra09968a), 2020-01-01
Supplement: c9ra09968a1.pdf [file c9ra09968a1.pdf]

## Supporting Information

### ***In situ* Raman and FTIR Spectroscopic Study of Al MOF Isomer MIL-68(Al) and MIL-53(Al) Formation**

Heidemarie Embrechts <sup>1,2</sup>; Martin Kriesten <sup>3</sup>; Matthias Ermer <sup>3</sup>; Wolfgang Peukert <sup>1,2</sup>; Martin Hartmann <sup>\*2,3</sup>; Monica Distaso <sup>\*1,2</sup>

<sup>1</sup> Institute of Particle Technology, FAU Erlangen-Nürnberg, Cauerstr. 4 – 91058, Erlangen, Germany

<sup>2</sup> Interdisciplinary Center for Functional Particle Systems, FAU Erlangen-Nürnberg, Haberstr. 9a – 91058, Erlangen, Germany

<sup>3</sup> Erlangen Center for Interface Research and Catalysis (ECRC), FAU Erlangen-Nürnberg, Egerlandstr. 3 – 91058, Erlangen, Germany

#### Table of Contents

|    |                                                        |   |
|----|--------------------------------------------------------|---|
| 1. | Simulated MIL-68(Al) and MIL-53(Al) XRD patterns ..... | 2 |
| 2. | MOF characterization .....                             | 2 |
| 3. | Activation energy calculations .....                   | 7 |
| 4. | Effect of HNO <sub>3</sub> addition in DMF .....       | 8 |
| 5. | Reference <sup>13</sup> C-NMR measurements .....       | 9 |

## 1. Simulated MIL-68(Al) and MIL-53(Al) XRD patterns

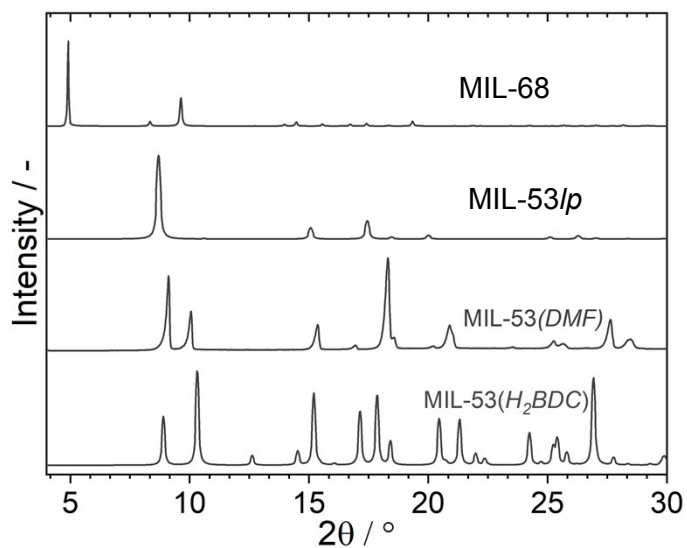

**Figure S1.** Simulated XRD patterns of MIL-68(Al), MIL-53/p, MIL-53(DMF), and MIL-53( $H_2BDC$ ) from the crystal unit structure.

## 2. MOF characterization

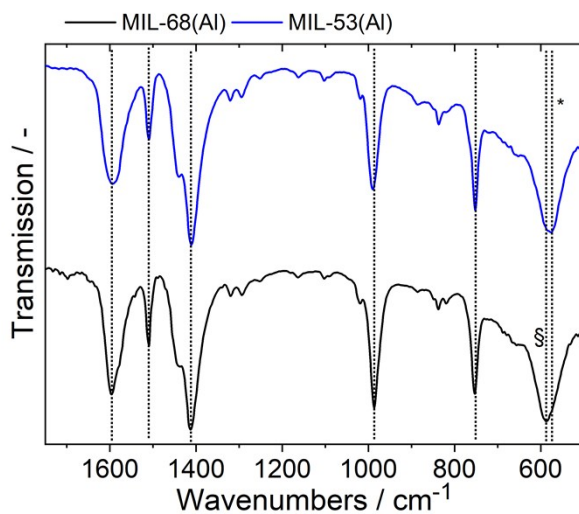

**Figure S2.** Comparison of the FTIR spectra of MIL-68(Al) and MIL-53(Al)

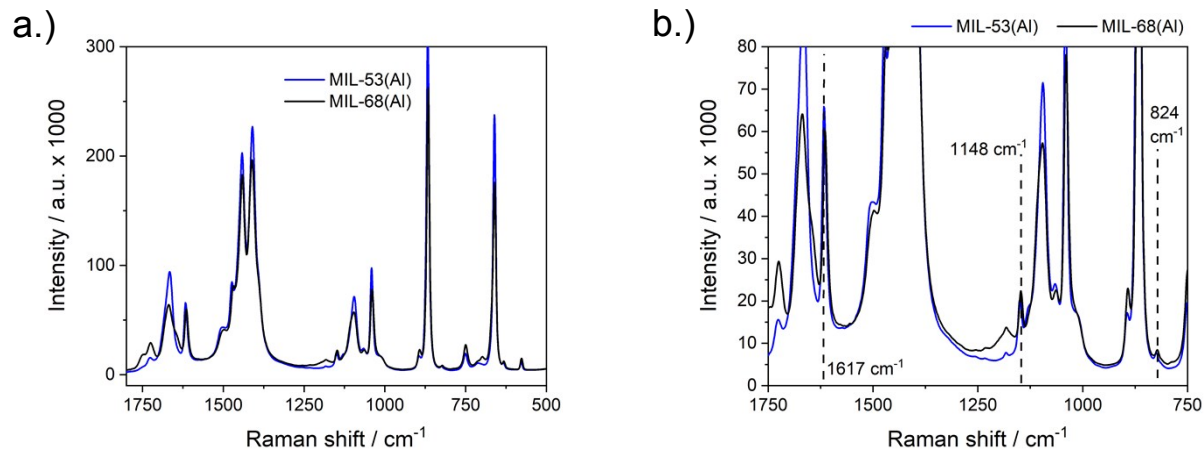

**Figure S3.** Comparison of the Raman spectra of MIL-68(Al) and MIL-53(Al) in DMF: (a) full intensity spectra and (b) close-up of the spectral range between 1750 and 750 cm<sup>-1</sup>. The three MOF band vibrations at 1617, 1148 and 824 cm<sup>-1</sup> are assigned to  $\nu_{CC}$ , ( $\nu_{CC} + \delta_{CH}$ ) and  $\omega_{CC}$ , respectively. Vibration bands have been assigned according to Hoffmann et al. reference 42 of the paper.

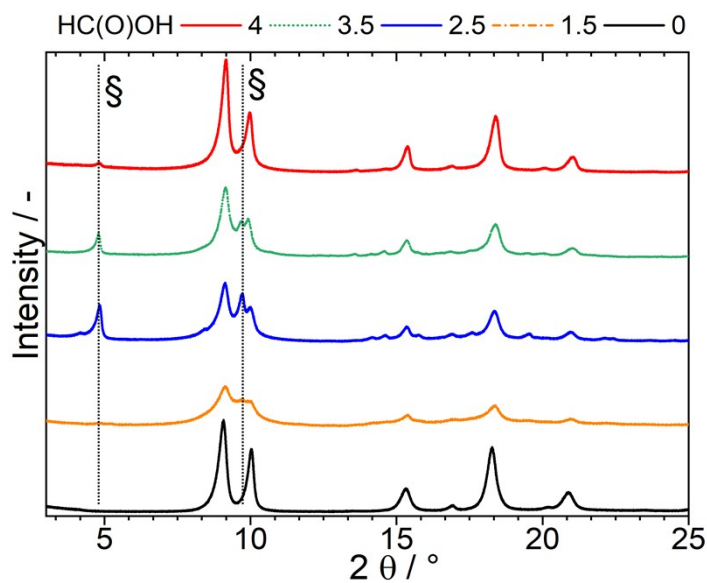

**Figure S4.** XRD patterns of MOF product synthesized with 0, 1.5, 2.5, 3.5, and 4 M formic acid modulation at 80 °C. § = MIL-68.

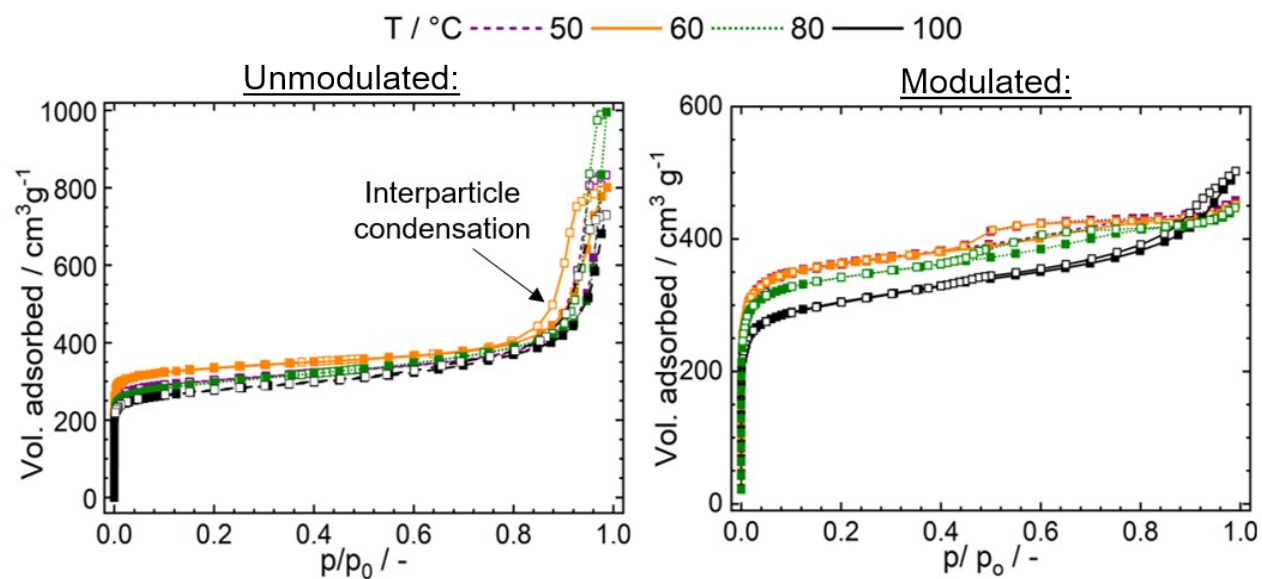

**Figure S5.** N<sub>2</sub> sorption isotherms of MOF product synthesized in DMF at various temperatures both without and with 2.5 M formic acid modulation.

**Table S1.** BET area in m<sup>2</sup> g<sup>-1</sup> of MOF products synthesized at various temperatures in DMF with and without 2.5 M formic acid modulation.

|             | 55 °C | 60 °C | 80 °C | 100 °C |
|-------------|-------|-------|-------|--------|
| unmodulated |       | 1294  | 1132  | 1062   |
| modulated   | 1468  | 1411  | 1323  | 1161   |

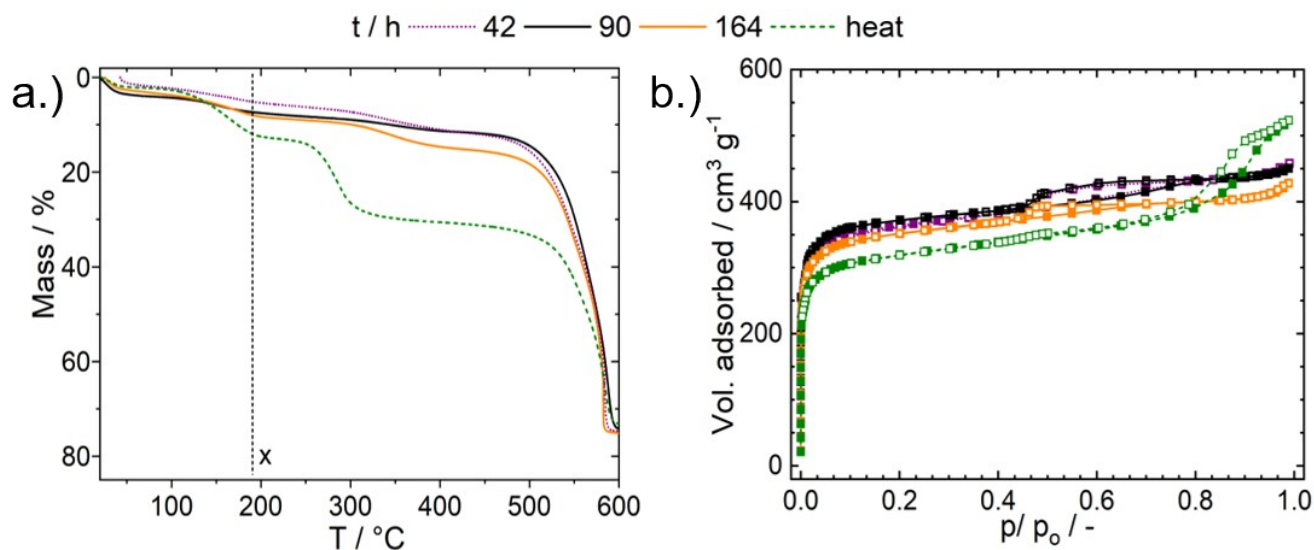

**Figure S6.** (a) TGA profiles, and (b) N<sub>2</sub> sorption isotherms of products of 2.5 M formic acid modulated synthesis in DMF at 55 °C after 42, 90 and 164 h heating and after an additional 48 h heating at 120 °C. x = MIL(DMF).

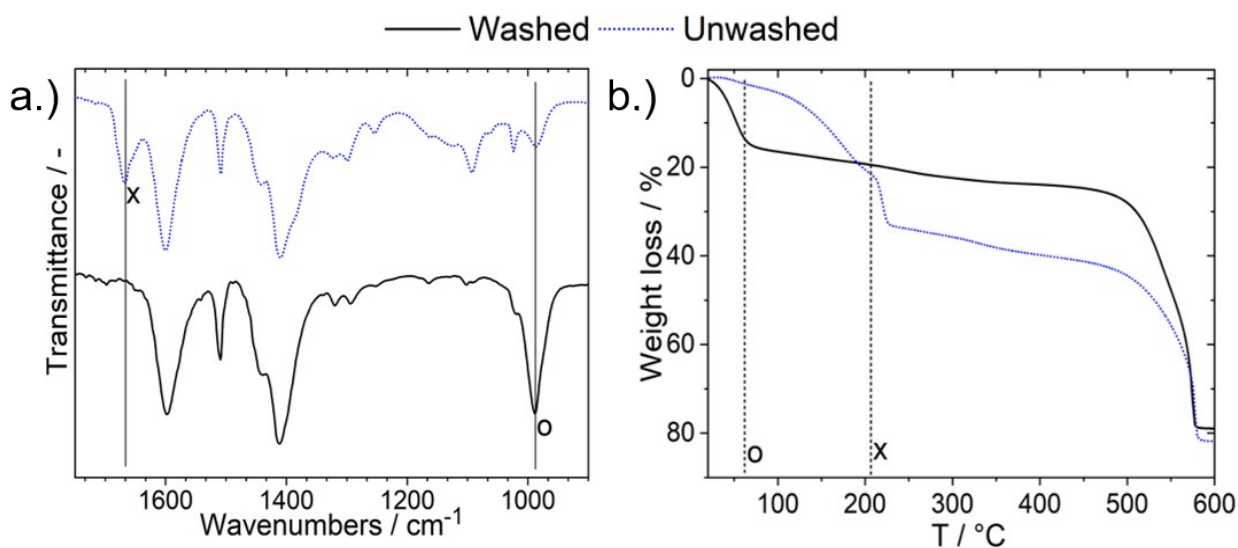

**Figure S7.** (a) FTIR, and (b) TGA profiles of MIL-68(Al) isolated after 42 h synthesis at 55 °C modulated with 2.5 M formic acid directly after synthesis (unwashed) and after three centrifugation rounds in ethanol (washed). x = MIL(DMF). o = MIL(H<sub>2</sub>O).

**Table S2.** BET area of MOF products synthesized in DMF with 2.5 M formic acid modulation at 55 °C after 42, 90, and 164 h and after an additional 48 h heating at 120 °C.

|  | 42 h | 90 h | 164 h | + heating |
|--|------|------|-------|-----------|
|--|------|------|-------|-----------|

|                                           |      |      |      |      |
|-------------------------------------------|------|------|------|------|
| BET area / m <sup>2</sup> g <sup>-1</sup> | 1422 | 1468 | 1372 | 1238 |
|-------------------------------------------|------|------|------|------|

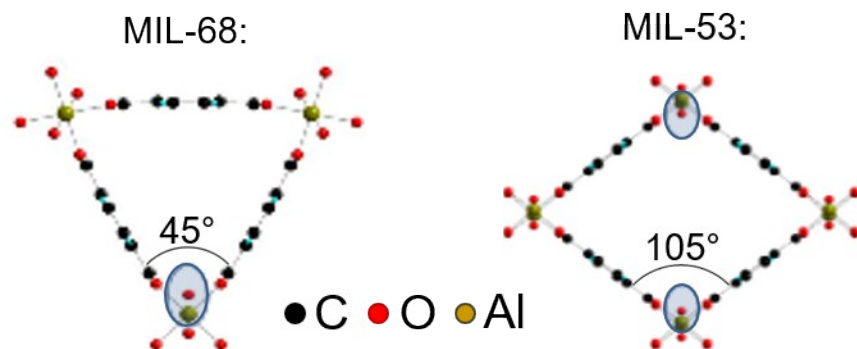

**Figure S8.** Pore geometry around the Al  $\mu$ -OH group in MIL-68(Al) compared to that in MIL-53(Al).

### 3. Activation energy calculations

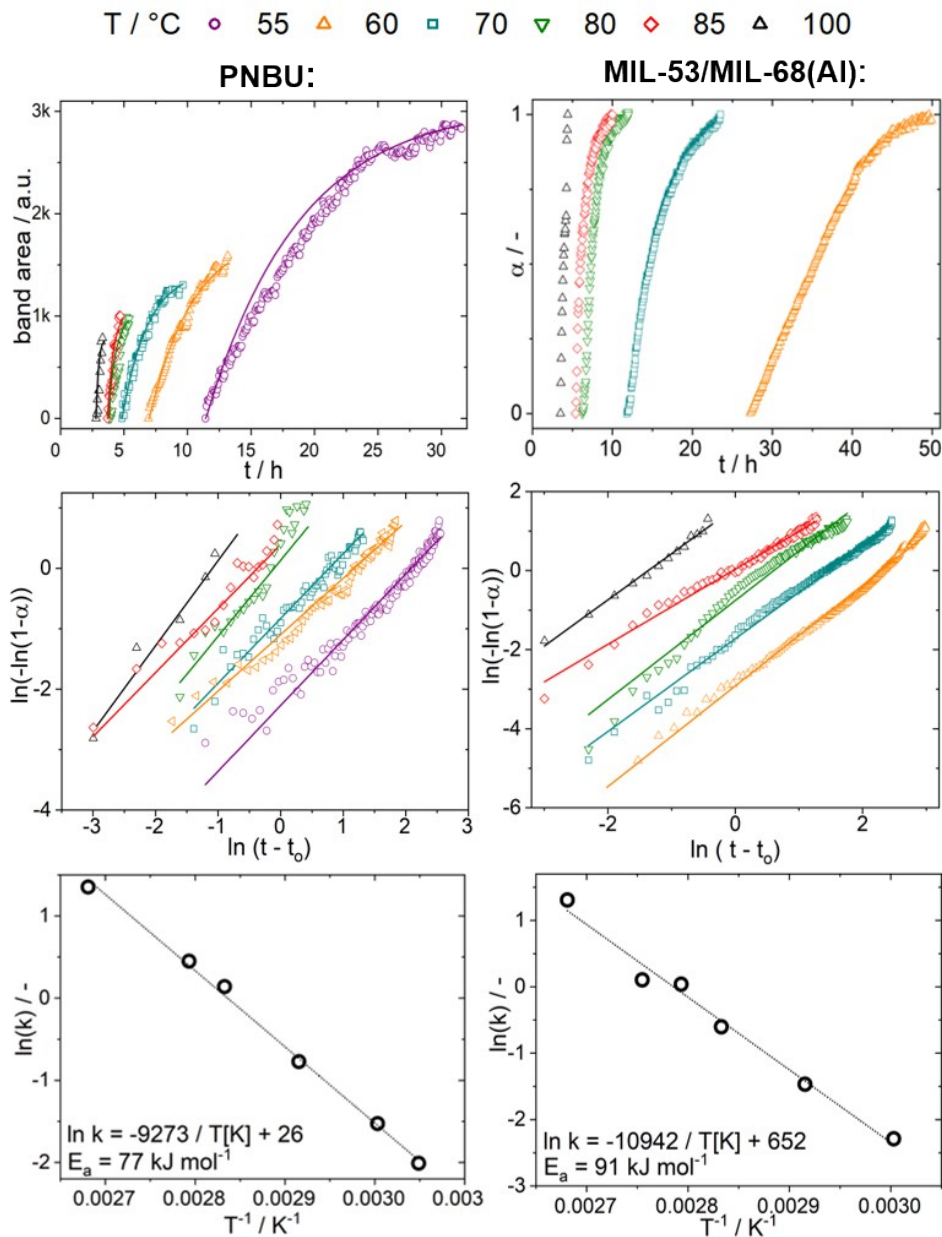

**Figure S9.** Sharp Hancock plots of the normalized Raman ( $\nu_{\text{CC}} + \delta_{\text{CH}}$ ) MOF and  $\delta(\text{COO}^-)$  PNBU band areas for 2.5 M formic acid modulated synthesis in DMF at various temperatures and the corresponding Arrhenius plots with slopes equal to  $-E_a$  (activation energy) / R.

#### 4. Effect of HNO<sub>3</sub> addition in DMF

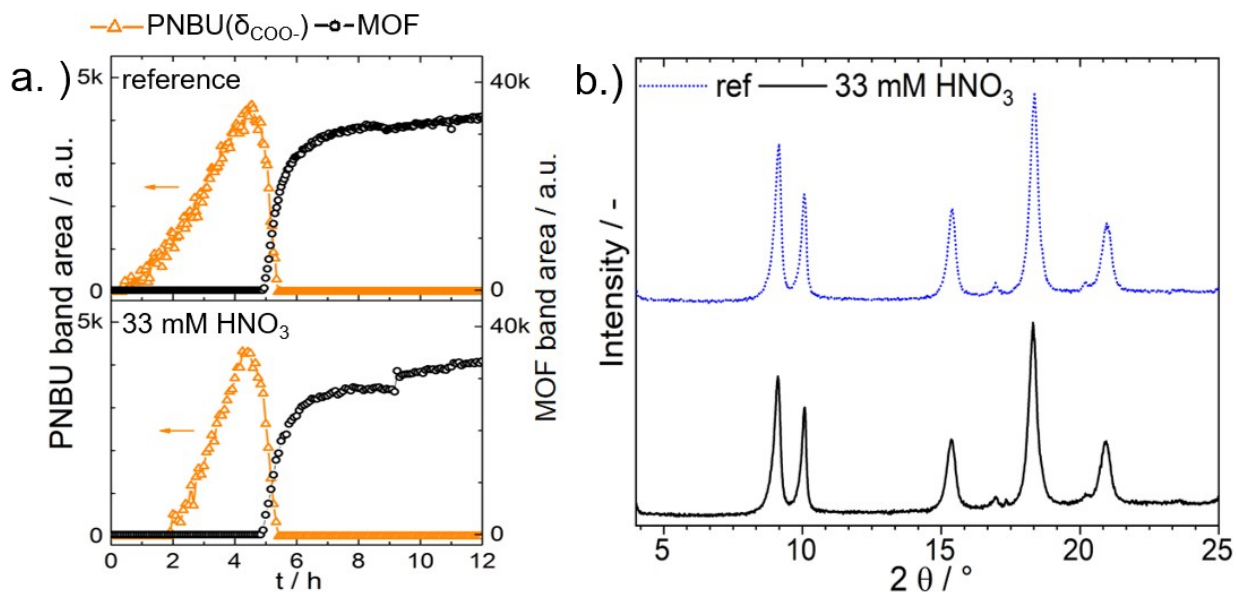

**Figure S10.** (a) Evolution of the characteristic PNBU and MOF band areas during MOF synthesis at 80 °C in DMF with and without 33 mM added HNO<sub>3</sub> (acid equivalent to 2.5 M formic acid). (b) XRD patterns of MIL-53(DMF) product synthesized at 80 °C for 17 h in DMF with and without 33 mM added HNO<sub>3</sub>.



## 5. Reference $^{13}\text{C}$ -NMR measurements

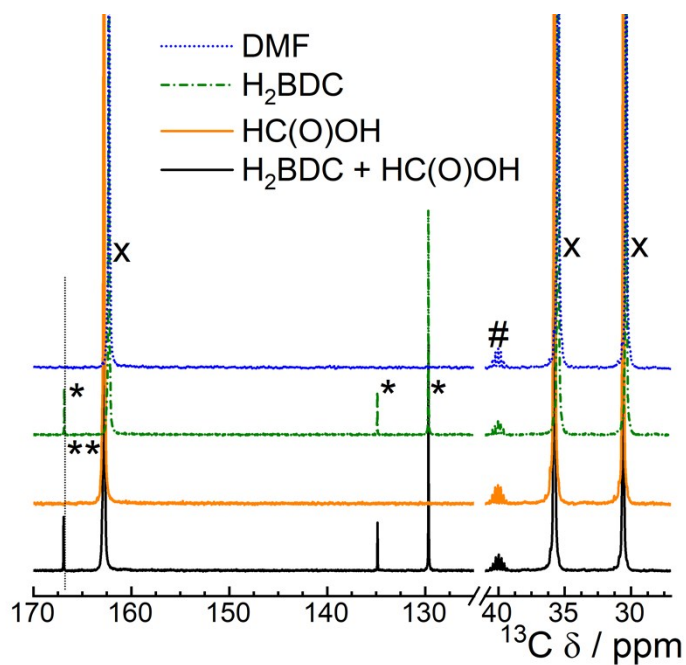

**Figure S11.**  $^{13}\text{C}$ -NMR spectra of DMF, 0.33 M  $\text{H}_2\text{BDC}$  in DMF, 2.5 M  $\text{HC(O)OH}$  in DMF, and both 0.33 M  $\text{H}_2\text{BDC}$  and 2.5 M  $\text{HC(O)OH}$  in DMF. x = DMF, # = septet from DMSO, \* =  $\text{H}_2\text{BDC}$ , \*\* =  $\text{HC(O)OH}$ .
